# Supplementary material
Source: PubMed Central journal article supplement (PMC3071911)
Supplement: mmc1.pdf [file mmc1.pdf]

**Supplementary Data**

**American Journal of Human Genetics, Volume 88**

**A Mutation in *LIPN*, Encoding Epidermal  
Lipase N, Causes a Late Onset Form  
of Autosomal-Recessive Congenital Ichthyosis**

**Shirli Israeli, Ziyad Khamaysi, Dana Fuchs-Telem, Janna Nousbeck,  
Reuven Bergman, Ofer Sarig, and Eli Sprecher**

Table S1. List of genes sequenced from the disease interval

| Symbol                       | <a href="#">OMIM</a> | Putative function                                                    |
|------------------------------|----------------------|----------------------------------------------------------------------|
| <a href="#">AGAP11</a>       |                      | ankyrin repeat and GTPase domain Arf GTPase activating protein 11    |
| <a href="#">ATAD1</a>        |                      | ATPase family, AAA domain containing 1                               |
| <a href="#">BMPR1A</a>       | _____                | bone morphogenetic protein receptor, type IA                         |
| <a href="#">C10orf116</a>    |                      | chromosome 10 open reading frame 116                                 |
| <a href="#">C10orf99</a>     |                      | chromosome 10 open reading frame 99                                  |
| <a href="#">CH25H</a>        | _____                | cholesterol 25-hydroxylase                                           |
| <a href="#">CTSLL1</a>       |                      | cathepsin L-like 1                                                   |
| <a href="#">FAM25A</a>       |                      | family with sequence similarity 25, member A                         |
| <a href="#">FAM35A</a>       |                      | family with sequence similarity 35, member A                         |
| <a href="#">GHITM</a>        |                      | growth hormone inducible transmembrane protein                       |
| <a href="#">KIAA1128</a>     |                      |                                                                      |
| <a href="#">LIPK</a>         |                      | lipase, family member K                                              |
| <a href="#">LIPM</a>         |                      | lipase, family member M                                              |
| <a href="#">LIPN</a>         |                      | lipase, family member N                                              |
| <a href="#">LOC100131699</a> |                      | hypothetical LOC100131699                                            |
| <a href="#">LOC100288691</a> |                      | similar to hCG2040565                                                |
| <a href="#">LOC100288717</a> |                      | similar to hCG2039035                                                |
| <a href="#">LOC100289138</a> |                      | hypothetical protein LOC100289138                                    |
| <a href="#">LOC439994</a>    |                      | hypothetical LOC439994                                               |
| <a href="#">LOC642934</a>    |                      | hypothetical LOC642934                                               |
| <a href="#">LOC728190</a>    |                      | hypothetical LOC728190                                               |
| <a href="#">LRIT1</a>        |                      | leucine-rich repeat, immunoglobulin-like and transmembrane domains 1 |
| <a href="#">LRIT2</a>        |                      | leucine-rich repeat, immunoglobulin-like and transmembrane domains 2 |
| <a href="#">MINPP1</a>       | _____                | multiple inositol polyphosphate histidine phosphatase, 1             |
| <a href="#">MIR346</a>       | _____                | microRNA 346                                                         |
| <a href="#">MMRN2</a>        | _____                | multimerin 2                                                         |
| <a href="#">SNCG</a>         | _____                | synuclein, gamma (breast cancer-specific protein 1                   |
| <a href="#">WAPAL</a>        | _____                | wings apart-like homolog (Drosophila                                 |

Table S2. Sequence of oligonucleotides used to sequence three epidermal lipase genes

| NAME          | PRIMER                    | PRODUCT SIZE |
|---------------|---------------------------|--------------|
| LIPN-Exon1F   | TCTGCCTTCGGTGTTATTCA      |              |
| LIPN-Exon1R   | CAACAGGACCTTTCGTAACCT     |              |
| LIPN-Exon2F   | CCTGGTGCTACAAATTCAGA      |              |
| LIPN-Exon2R   | CAAAGAGTGAGCCTCCCTGA      |              |
| LIPN-Exon3F   | CTGTGATGTTTCCGACATGC      |              |
| LIPN-Exon3R   | GCTTCTTGCTGTTACCCTCC      |              |
| LIPN-Exon4F   | AAGAAGTGAGCAAGTGCTCTGA    |              |
| LIPN-Exon4R   | CCAACATAAAGGTGAACTCCTG    |              |
| LIPN-Exon5F   | CCCAGTATGATCACGATAGAAGG   |              |
| LIPN-Exon5R   | CACAAGCACATACCACAGAG      |              |
| LIPN-Exon6F   | GGGCTTGTTGTCCTTGTTGT      |              |
| LIPN-Exon6R   | AAGGGTTTGAATACCATATGAA    |              |
| LIPN-Exon7F   | TTTGCTAATTCTGTGCATCATTT   |              |
| LIPN-Exon7R   | TGTTAACAGGGTCAATTCTGTCT   |              |
| LIPN-Exon8F   | TTCTGGTGATCTAGGAGCCC      |              |
| LIPN-Exon8R   | TGCCACCAAATGACAGGTAG      |              |
| LIPN-Exon9F   | GGCCATTGTCCACATTCATT      |              |
| LIPN-Exon9R   | GGGACAACCTCATTGTTGGT      |              |
| LIPM-EXON1F   | ATTGGAAGAGGGAATTGCAG      |              |
| LIPM-EXON1R   | CTCTTCTAGTATGAATCACCACCAT |              |
| LIPM-EXON1F   | CGCCTGTGGAAAGGAAGTAG      |              |
| LIPM-EXON1R   | GGAATGGCCTTAGCTGTAGAA     |              |
| LIPM-EXON2F   | AAAGCAAGGACTTTCACTGTGTT   |              |
| LIPM-EXON2R   | CACAAGGAAATCGTGACTGC      |              |
| LIPM-EXON3F   | AGGAAATCAAGGCACACACC      |              |
| LIPM-EXON3R   | CCAAATACTAGAAGCCGTAATTTT  |              |
| LIPM-EXON4F   | GGGCTTGTTTGTAACCTGG       |              |
| LIPM-EXON4R   | CAGGGATAGCTAGTGTCGTATGC   |              |
| LIPM-EXON5-6F | GGAGAGGTAAGATGCAGTCACA    |              |
| LIPM-EXON5-6R | CACTGGCATTAGCTCTCCCT      |              |
| LIPM-EXON7F   | CCCTGGAGATTTGGTCTTGA      |              |
| LIPM-EXON7R   | CCCTGGCTTATCTAAATGGTGT    |              |
| LIPM-EXON8F   | GTGCACACTGGGTAGCACAT      |              |
| LIPM-EXON8R   | AACGTCCCTGTCATACATTTCC    |              |
| LIPM-EXON9F   | CTTCACCACAACAGATGGCA      |              |

|               |                          |  |
|---------------|--------------------------|--|
| LIPM-EXON9R   | TTCTGCCTTCATGGGTCCTA     |  |
| LIPK-EXON1F   | TGGTTAAAGCACAGCCTAGAA    |  |
| LIPK-EXON1R   | CACTGGAGGAATTGCTGAAA     |  |
| LIPK-EXON2F   | TGGGACAGGTGCCTTTAGTT     |  |
| LIPK-EXON2R   | TGCTTGACTTCTCCCAGGAC     |  |
| LIPK-EXON3F   | GACTAGATCCCAGGTTTGCC     |  |
| LIPK-EXON3R   | TCCTTCTTGTGGATTCCATTG    |  |
| LIPK-EXON4-5F | TGACTTGCAATCAAGGTGACA    |  |
| LIPK-EXON4-5R | TTCCCTGAACTCTGCTAATAAGAT |  |
| LIPK-EXON6F   | TGTGCAGTCCTTCTTTGAACTA   |  |
| LIPK-EXON6R   | CAGTTGCCATACAATCCAGG     |  |
| LIPK-EXON7F   | AGGTGGAGCCTGCAGTGA       |  |
| LIPK-EXON7R   | CCCAGACACTGAGGACAAGG     |  |
| LIPK-EXON8F   | TGTTTCTAAAGACTGGGGCATAA  |  |
| LIPK-EXON8R   | GCATATGGCAAGAACCCAAT     |  |
| LIPK-EXON9F   | TGCACGAGAATGGTTTCAAG     |  |
| LIPK-EXON9R   | TCATATCCCACCCACATTGA     |  |
